# Supplementary material
Source: Springer Nature journal article supplement (https://www.springermedizin.de/resource/supplementary/12891_2010_1087_MOESM6_ESM.pdf/9507684)

**A**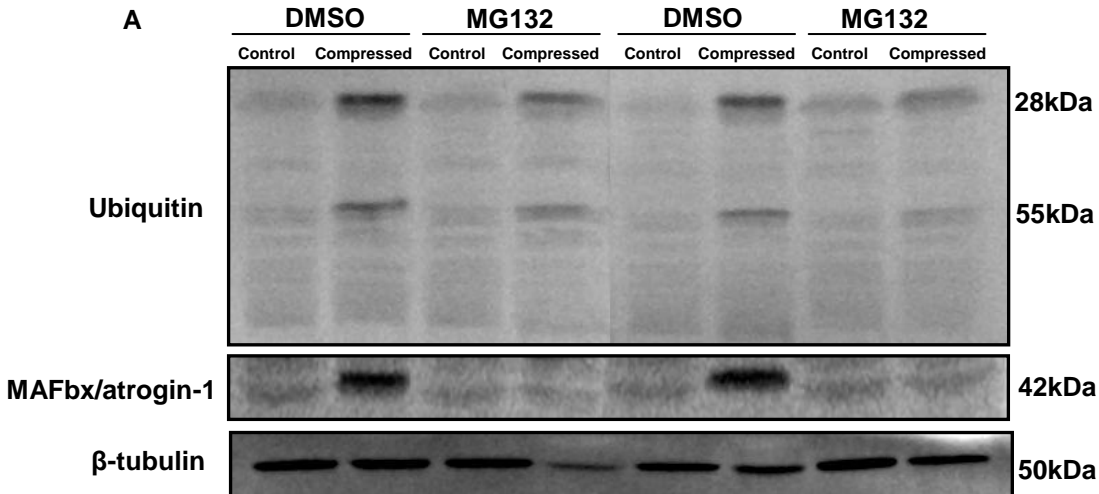**B**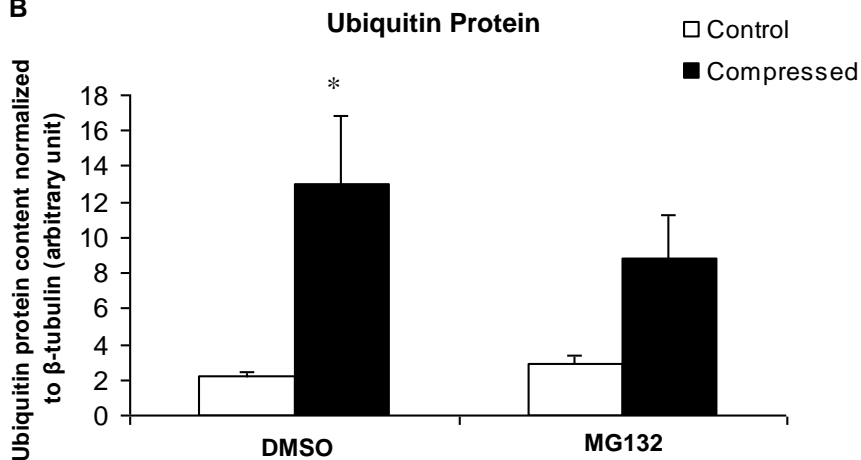**C**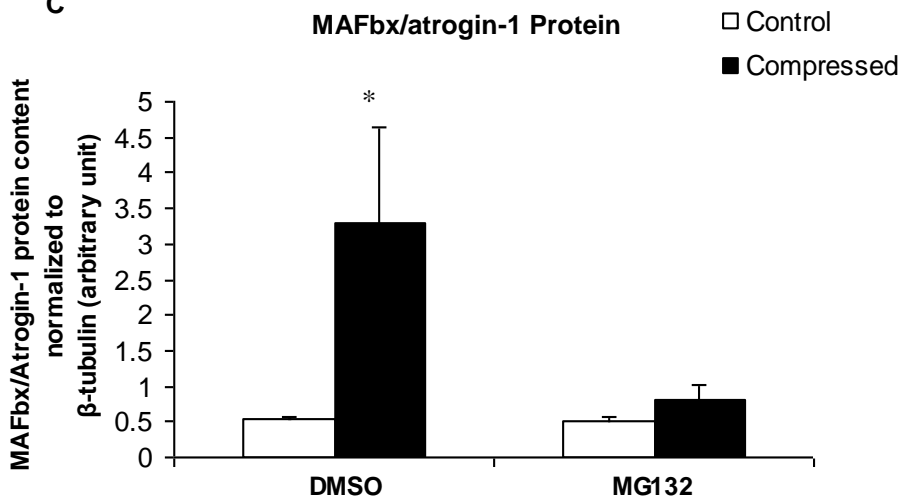

Supplement: MOESM6 [file 9507684]
